# Supplementary material
Source: MDPI journal article supplement (https://www.mdpi.com/2073-4441/13/18/2539)
Supplement: s1 [file s1]

## *Supplementary Materials*

### **Carbamazepine levels related to the demographic indicators in groundwater of densely populated area**

**Salma Ebrahimzadeh <sup>1, \*</sup>, Sara Castiglioni <sup>2</sup>, Francesco Riva <sup>2</sup>, Ettore Zuccato <sup>2</sup>, Arianna Azzellino <sup>1</sup>**

<sup>1</sup> Politecnico di Milano, Department of Civil and Environmental Engineering;

salma.ebrahimzadeh@polimi.it

<sup>2</sup> Institute di Ricerche Farmacologiche Mario Negri IRCCS, Department of Environmental Health Sciences

\* Correspondence: salma.ebrahimzadeh@polimi.it; Tel.: +393279042372

Address: Politecnico di Milano

Civil and Environmental Engineering Department

P.za Leonardo da Vinci, 32

20133 Milano - ITALY

ph. +39 02 - 23996431

## 1. Materials and methods

### 1.1 Analytical Standard, Material and Method for Carbamazepine

The reference standard was all analytical grade in powder form with purity higher than 98%. The labelled compound carbamazepine d10 (99% D) was purchased from Sigma-Aldrich (St. Louis, MO, USA). Stock solution containing mixtures of the analytes were prepared at 10 ng/mL with methanol and stored at -20 °C in the dark up to a maximum of two months. Working solutions (1, 0.1 and 0.01 ng/mL) were prepared before each analytical batch and stored at -20 °C in the dark.

For determining the limits of quantification of CBZ, instrumental detection limits (IDL) and instrumental quantification limits (IQL) were determined by direct injection of picogram quantities of substance. The detection limits (LOD) and quantification limits (LOQ) for the whole method were calculated from real sample or by spiking wastewater sample with low amount of the substance, depending on the typical concentrations in sample. IDL and LOD were calculated as the concentrations giving peaks for which the signal-to-noise ratio was 3, and IQL and LOQ as the concentrations giving peaks for which the signal-to-noise ratio was 10. LOQs were used as cut-off values for quantification of the analytes. Finally, the LOQ measured for CBZ was 0.18 ng/L.

Specific analytical methods based on solid phase extraction (SPE) and liquid chromatography tandem mass spectrometry analysis (LC-MS/MS) were developed and validated for analyses. Generally, samples were double filtered on glass microfiber filters GF/A 1.6 mm (Whatman, Kent, U.K.) and on a mixed cellulose membrane filter 0.45 mm (Whatman, Kent, U.K.).

## 1.2 demographic variables

**Table S1.** Demographic variables of the ISTAT (2011) dataset

| CODE | Demographic variables                 |
|------|---------------------------------------|
| P1   | population-Total                      |
| P2   | population-Males                      |
| P3   | population-Females                    |
| P4   | population-unmarried                  |
| P5   | population-married                    |
| P6   | population-separated                  |
| P7   | population-widowers                   |
| P8   | population-divorced                   |
| P9   | population-unmarried males            |
| P10  | population-married or separated males |
| P11  | population-legally separated males    |
| P12  | population-widowed males              |
| P13  | population-divorced males             |
| P14  | population-age < 5 years              |
| P15  | population-age 5-9 years              |
| P16  | population-age 10-14 years            |
| P17  | population-age 15-19 years            |
| P18  | population-age 20-24 years            |
| P19  | population-age 25-29 years            |
| P20  | population-age 30-34 years            |
| P21  | population-age 35-39 years            |
| P22  | population-age 40-44 years            |
| P23  | population-age 45-49 years            |
| P24  | population-age 50-54 years            |
| P25  | population-age 55-59 years            |
| P26  | population-age 60-64 years            |
| P27  | population-age 65-69 years            |
| P28  | population-age 70-74 years            |
| P29  | population-age > 74 years             |
| P30  | population-males-age < 5 years        |
| P31  | population-males-age 5-9 years        |
| P32  | population-males-age 10-14 years      |
| P33  | population-males-age 15-19 years      |
| P34  | population-males-age 20-24 years      |
| P35  | population-males-age 25-29 years      |
| P36  | population-males-age 30-34 years      |
| P37  | population-males-age 35-39 years      |
| P38  | population-males-age 40-44 years      |

|     |                                                                                    |
|-----|------------------------------------------------------------------------------------|
| P39 | population-males-age 45-49 years                                                   |
| P40 | population-males-age 50-54 years                                                   |
| P41 | population-males-age 55-59 years                                                   |
| P42 | population-males-age 60-64 years                                                   |
| P43 | population-males-age 65-69 years                                                   |
| P44 | population-males-age 70-74 years                                                   |
| P45 | population-males-age > 74 years                                                    |
| P46 | population-total of 6 years and more                                               |
| P47 | population with university degrees + tertiary diplomas                             |
| P48 | population with higher Secondary school diploma                                    |
| P49 | Inferior population residence                                                      |
| P50 | population with elementary license                                                 |
| P51 | population-know Alphabets                                                          |
| P52 | population-illiterate                                                              |
| P53 | population-Males 6 years and older                                                 |
| P54 | population-males with university degrees                                           |
| P55 | population-males with high school diploma                                          |
| P56 | population-males with lower average                                                |
| P57 | population-males with elementary licence                                           |
| P58 | population-males know alphabets                                                    |
| P59 | population-illiterate males                                                        |
| P60 | population-Total of 15 years and more belonging to the total manpower              |
| P61 | population-Total of 15 years and more occupied                                     |
| P62 | population-Total of 15 years and more unemployed looking for new employment        |
| P63 | population-males aged 15 years and more belonging to the labour force              |
| P64 | population-males aged 15 years and more occupied                                   |
| P65 | population-males aged 15 years and more unemployed looking for new employment      |
| P66 | population-Total of 15 years and more non-labour force                             |
| P67 | population-males aged 15 years and more non-labour force                           |
| P68 | population-Total of 15 years and more housewares/s                                 |
| P69 | population-Total of 15 years and more students                                     |
| P70 | population-Total males of 15 years and more students                               |
| P71 | population-Total of 15 years and more in other state                               |
| P72 | population-Total males of 15 years and more in other condition                     |
| P73 | population moving Daily in the municipality of habitual dwelling                   |
| P74 | population moving daily out of the municipality of habitual dwelling               |
| P75 | population-Total of 15 years and more earners of income from work or capital       |
| P76 | population-Total males of 15 years and more earners of income from work or capital |

## 2. Results

### 2.1 Ground water monitoring stations

**Table S2.** Information of groundwater monitoring stations and population density in 1.5 km buffer

| Monitoring station in aquifer B | name of monitoring stations in aquifer B | Monitoring station in aquifer A | name of monitoring stations in aquifer A | Avg. of Population in each buffer | Sum. Of population in each buffer |
|---------------------------------|------------------------------------------|---------------------------------|------------------------------------------|-----------------------------------|-----------------------------------|
| B1                              | LINATE                                   | A1                              | FOG72                                    | 161.15                            | 9508                              |
| B2                              | SALEMI                                   | A2                              | 2BIS                                     | 237.51                            | 39189                             |
| B3                              | ANFOSSI                                  | A3                              | MM55                                     | 208.03                            | 111086                            |
| B4                              | VIALBA                                   | A4                              | SAP1                                     | 205.21                            | 32834                             |
| B5                              | ARMI                                     | A5                              | MM75                                     | 199.2                             | 96214                             |
| B6                              | GORLA                                    | A6                              | SAP6                                     | 198.21                            | 71950                             |
| B7                              | FELTRE                                   | A7                              | FOG14                                    | 229.7                             | 73046                             |
| B8                              | ABBIATEGRAS<br>SO                        | A8                              | MM163                                    | 228.98                            | 53811                             |
| B9                              | PARCO                                    | A9                              | ACQ2                                     | 159.74                            | 77475                             |
| B10                             | SUZZANI                                  | A10                             | SAP3                                     | 201.04                            | 60313                             |
| B11                             | NOVARA                                   | A11                             | SAP16                                    | 195.18                            | 16981                             |
| B12                             | OVIDIO                                   | A12                             | ACQ6                                     | 215.86                            | 44683                             |
| B13                             | CANTORE                                  | A13                             | INT2                                     | 162.85                            | 93153                             |
| B14                             | ESTE                                     | A14                             | MM71                                     | 151.93                            | 84779                             |
| B15                             | PADOVA                                   | A15                             | MM115                                    | 257.04                            | 17479                             |
| B16                             | COMASINA                                 | A16                             | MM7                                      | 213.01                            | 88827                             |
| B17                             | LAMBRO                                   | A17                             | FOG43                                    | 216.24                            | 42600                             |
| B18                             | SAN SIRO                                 | A18                             | MM177                                    | 197.34                            | 70254                             |
| B19                             | ASSIANO                                  | A19                             | FOG71                                    | 155.44                            | 5285                              |
| B20                             | BAGGIO                                   | A20                             | SAP26                                    | 240.64                            | 38262                             |
| B21                             | CHIUSABELLA                              | A21                             | SAP18                                    | 189.39                            | 40718                             |

### 2.2 Result of PCA/FA analysis

Factor loadings matrix of the PCA/FA analysis is shown in table S3, P1-P76 show the demographic information of Milan area which presented in table S1.

**Table S3.** 76 demographic variables of the ISTAT (2011) dataset and factor loadings matrix of the PCA/FA analysis; The factor loadings higher than 0.5 and lower than –0.5 are shown in bold.

| Num. | Demographic variables                 | F1= family index | F2= aging index | F3= adolescents and quinquagenarian Index | F4= divorce index | F5= illiterate index | F6= sexagenarian index | F7= child index | F8= education index |
|------|---------------------------------------|------------------|-----------------|-------------------------------------------|-------------------|----------------------|------------------------|-----------------|---------------------|
| P1   | population-Total                      | <b>0.63</b>      | 0.52            | 0.41                                      | 0.24              | 0.17                 | 0.21                   | 0.16            | 0.08                |
| P2   | population-Males                      | <b>0.67</b>      | 0.45            | 0.42                                      | 0.24              | 0.18                 | 0.23                   | 0.16            | 0.04                |
| P3   | population-Females                    | <b>0.59</b>      | 0.57            | 0.40                                      | 0.25              | 0.15                 | 0.19                   | 0.15            | 0.11                |
| P4   | population-unmarried                  | <b>0.71</b>      | 0.36            | 0.41                                      | 0.28              | 0.22                 | 0.14                   | 0.15            | 0.09                |
| P5   | population-married                    | <b>0.59</b>      | 0.53            | 0.43                                      | 0.11              | 0.07                 | 0.33                   | 0.18            | 0.06                |
| P6   | population-separated                  | 0.40             | 0.35            | 0.27                                      | <b>0.58</b>       | 0.17                 | 0.18                   | 0.16            | 0.05                |
| P7   | population-widowers                   | 0.23             | <b>0.84</b>     | 0.18                                      | 0.25              | 0.21                 | -0.06                  | 0.03            | 0.03                |
| P8   | population-divorced                   | 0.40             | 0.41            | 0.29                                      | <b>0.58</b>       | 0.14                 | 0.13                   | 0.08            | 0.19                |
| P9   | population-unmarried males            | <b>0.72</b>      | 0.32            | 0.42                                      | 0.27              | 0.26                 | 0.15                   | 0.15            | 0.03                |
| P10  | population-married or separated males | <b>0.61</b>      | 0.52            | 0.42                                      | 0.11              | 0.09                 | 0.32                   | 0.18            | 0.04                |
| P11  | population-legally separated males    | 0.39             | 0.24            | 0.20                                      | <b>0.62</b>       | 0.11                 | 0.14                   | 0.12            | 0.07                |
| P12  | population-widowed males              | 0.29             | <b>0.74</b>     | 0.17                                      | 0.19              | 0.15                 | -0.02                  | 0.01            | 0.02                |
| P13  | population-divorced males             | 0.36             | 0.27            | 0.20                                      | <b>0.64</b>       | 0.12                 | 0.09                   | 0.08            | 0.18                |
| P14  | population-age < 5 years              | <b>0.81</b>      | 0.16            | 0.23                                      | 0.13              | 0.12                 | 0.05                   | 0.27            | 0.11                |
| P15  | population-age 5-9 years              | 0.40             | 0.20            | 0.38                                      | 0.15              | 0.11                 | 0.10                   | <b>0.52</b>     | 0.12                |
| P16  | population-age 10-14 years            | 0.45             | 0.28            | <b>0.57</b>                               | 0.16              | 0.14                 | 0.10                   | 0.45            | 0.04                |
| P17  | population-age 15-19 years            | 0.37             | 0.29            | <b>0.75</b>                               | 0.16              | 0.19                 | 0.10                   | 0.21            | 0.00                |
| P18  | population-age 20-24 years            | 0.49             | 0.27            | <b>0.63</b>                               | 0.21              | 0.30                 | 0.14                   | -0.02           | -0.05               |
| P19  | population-age 25-29 years            | <b>0.74</b>      | 0.24            | 0.32                                      | 0.21              | 0.26                 | 0.15                   | -0.16           | 0.00                |
| P20  | population-age 30-34 years            | <b>0.87</b>      | 0.20            | 0.13                                      | 0.18              | 0.21                 | 0.12                   | -0.06           | 0.03                |

|     |                                                        |             |             |             |      |             |             |             |             |
|-----|--------------------------------------------------------|-------------|-------------|-------------|------|-------------|-------------|-------------|-------------|
| P21 | population-age 35-39 years                             | <b>0.87</b> | 0.23        | 0.16        | 0.19 | 0.12        | 0.10        | 0.13        | 0.05        |
| P22 | population-age 40-44 years                             | <b>0.76</b> | 0.30        | 0.30        | 0.22 | 0.10        | 0.11        | 0.28        | 0.09        |
| P23 | population-age 45-49 years                             | <b>0.60</b> | 0.37        | 0.48        | 0.26 | 0.12        | 0.09        | 0.25        | 0.07        |
| P24 | population-age 50-54 years                             | 0.48        | 0.39        | <b>0.60</b> | 0.32 | 0.10        | 0.13        | 0.10        | 0.05        |
| P25 | population-age 55-59 years                             | 0.41        | 0.40        | <b>0.53</b> | 0.33 | 0.14        | 0.32        | -0.03       | 0.06        |
| P26 | population-age 60-64 years                             | 0.34        | 0.46        | 0.36        | 0.29 | 0.10        | <b>0.58</b> | 0.02        | 0.07        |
| P27 | population-age 65-69 years                             | 0.28        | 0.59        | 0.23        | 0.16 | 0.09        | <b>0.62</b> | 0.10        | 0.11        |
| P28 | population-age 70-74 years                             | 0.23        | <b>0.77</b> | 0.17        | 0.09 | 0.08        | 0.41        | 0.17        | 0.07        |
| P29 | population-age > 74 years                              | 0.19        | <b>0.90</b> | 0.19        | 0.16 | 0.13        | -0.07       | 0.04        | 0.11        |
| P30 | population-males-age < 5 years                         | <b>0.78</b> | 0.15        | 0.20        | 0.13 | 0.13        | 0.04        | 0.27        | 0.10        |
| P31 | population-males-age 5-9 years                         | 0.50        | 0.18        | 0.34        | 0.14 | 0.10        | 0.11        | <b>0.55</b> | 0.10        |
| P32 | population-males-age 10-14 years                       | 0.41        | 0.25        | <b>0.54</b> | 0.14 | 0.14        | 0.09        | 0.45        | 0.04        |
| P33 | population-males-age 15-19 years                       | 0.34        | 0.25        | <b>0.74</b> | 0.12 | 0.20        | 0.09        | 0.17        | -0.02       |
| P34 | population-males-age 20-24 years                       | 0.44        | 0.23        | <b>0.60</b> | 0.18 | 0.33        | 0.12        | -0.05       | -0.08       |
| P35 | population-males-age 25-29 years                       | <b>0.68</b> | 0.20        | 0.31        | 0.18 | 0.31        | 0.15        | -0.19       | -0.05       |
| P36 | population-males-age 30-34 years                       | <b>0.83</b> | 0.18        | 0.12        | 0.15 | 0.27        | 0.12        | -0.12       | -0.04       |
| P37 | population-males-age 35-39 years                       | <b>0.87</b> | 0.21        | 0.13        | 0.18 | 0.15        | 0.10        | 0.08        | -0.01       |
| P38 | population-males-age 40-44 years                       | <b>0.77</b> | 0.27        | 0.23        | 0.21 | 0.14        | 0.12        | 0.24        | 0.04        |
| P39 | population-males-age 45-49 years                       | <b>0.61</b> | 0.33        | 0.41        | 0.27 | 0.13        | 0.08        | 0.28        | 0.05        |
| P40 | population-males-age 50-54 years                       | 0.47        | 0.35        | <b>0.57</b> | 0.31 | 0.10        | 0.09        | 0.13        | 0.02        |
| P41 | population-males-age 55-59 years                       | 0.40        | 0.35        | <b>0.52</b> | 0.35 | 0.14        | 0.25        | -0.03       | 0.03        |
| P42 | population-males-age 60-64 years                       | 0.33        | 0.38        | 0.39        | 0.33 | 0.10        | <b>0.52</b> | -0.01       | 0.04        |
| P43 | population-males-age 65-69 years                       | 0.29        | 0.49        | 0.24        | 0.18 | 0.07        | <b>0.65</b> | 0.08        | 0.08        |
| P44 | population-males-age 70-74 years                       | 0.23        | <b>0.67</b> | 0.15        | 0.06 | 0.05        | 0.50        | 0.16        | 0.09        |
| P45 | population-males-age > 74 years                        | 0.20        | <b>0.88</b> | 0.22        | 0.08 | 0.05        | 0.05        | 0.09        | 0.09        |
| P46 | population-total of 6 years and more                   | <b>0.61</b> | 0.54        | 0.42        | 0.25 | 0.17        | 0.22        | 0.15        | 0.07        |
| P47 | population with university degrees + tertiary diplomas | 0.48        | 0.20        | 0.38        | 0.14 | -0.16       | 0.19        | 0.10        | <b>0.67</b> |
| P48 | population with higher Secondary school diploma        | <b>0.66</b> | 0.49        | 0.42        | 0.14 | 0.01        | 0.27        | 0.08        | 0.04        |
| P49 | Inferior population residence                          | 0.47        | <b>0.55</b> | 0.33        | 0.28 | 0.35        | 0.18        | 0.10        | -0.30       |
| P50 | population with elementary license                     | 0.31        | <b>0.66</b> | 0.19        | 0.30 | 0.40        | 0.06        | 0.12        | -0.31       |
| P51 | population-know Alphabets                              | <b>0.56</b> | 0.32        | 0.36        | 0.25 | 0.31        | 0.07        | 0.45        | -0.05       |
| P52 | population-illiterate                                  | 0.12        | 0.15        | 0.07        | 0.09 | <b>0.88</b> | -0.01       | 0.09        | -0.04       |
| P53 | population-Males 6 years and older                     | <b>0.65</b> | 0.47        | 0.43        | 0.24 | 0.18        | 0.24        | 0.15        | 0.04        |
| P54 | population-males with university degrees               | 0.46        | 0.19        | 0.38        | 0.13 | -0.15       | 0.19        | 0.11        | <b>0.68</b> |

|     |                                                                                    |             |             |             |             |             |      |             |       |
|-----|------------------------------------------------------------------------------------|-------------|-------------|-------------|-------------|-------------|------|-------------|-------|
| P55 | population-males with high school diploma                                          | <b>0.69</b> | 0.46        | 0.38        | 0.12        | 0.04        | 0.27 | 0.05        | -0.04 |
| P56 | population-males with lower average                                                | 0.48        | 0.45        | 0.32        | 0.29        | 0.39        | 0.17 | 0.09        | -0.37 |
| P57 | population-males with elementary licence                                           | 0.34        | <b>0.54</b> | 0.25        | 0.32        | 0.41        | 0.12 | 0.16        | -0.33 |
| P58 | population-males know alphabets                                                    | 0.50        | 0.21        | 0.35        | 0.19        | 0.26        | 0.10 | <b>0.52</b> | -0.01 |
| P59 | population-illiterate males                                                        | 0.19        | 0.06        | 0.06        | -0.02       | <b>0.86</b> | 0.05 | 0.05        | 0.01  |
| P60 | population-Total of 15 years and more belonging to the total manpower              | <b>0.77</b> | 0.34        | 0.40        | 0.26        | 0.11        | 0.17 | 0.10        | 0.09  |
| P61 | population-Total of 15 years and more occupied                                     | <b>0.78</b> | 0.33        | 0.40        | 0.22        | 0.08        | 0.17 | 0.10        | 0.13  |
| P62 | population-Total of 15 years and more unemployed looking for new employment        | 0.42        | 0.27        | 0.25        | <b>0.53</b> | 0.36        | 0.16 | 0.09        | -0.26 |
| P63 | population-males aged 15 years and more belonging to the labour force              | <b>0.78</b> | 0.31        | 0.39        | 0.26        | 0.15        | 0.17 | 0.10        | 0.07  |
| P64 | population-males aged 15 years and more occupied                                   | <b>0.79</b> | 0.30        | 0.40        | 0.21        | 0.11        | 0.17 | 0.10        | 0.11  |
| P65 | population-males aged 15 years and more unemployed looking for new employment      | 0.34        | 0.20        | 0.19        | <b>0.55</b> | 0.38        | 0.15 | 0.06        | -0.30 |
| P66 | population-Total of 15 years and more non-labour force                             | 0.34        | <b>0.75</b> | 0.37        | 0.22        | 0.21        | 0.26 | 0.10        | 0.04  |
| P67 | population-males aged 15 years and more non-labour force                           | 0.35        | <b>0.71</b> | 0.38        | 0.19        | 0.22        | 0.34 | 0.08        | -0.04 |
| P68 | population-Total of 15 years and more housewares/s                                 | 0.32        | 0.49        | 0.46        | 0.27        | 0.26        | 0.21 | 0.21        | 0.12  |
| P69 | population-Total of 15 years and more students                                     | 0.38        | 0.28        | <b>0.78</b> | 0.13        | 0.01        | 0.17 | 0.12        | 0.21  |
| P70 | population-Total males of 15 years and more students                               | 0.34        | 0.25        | <b>0.79</b> | 0.10        | 0.02        | 0.16 | 0.09        | 0.19  |
| P71 | population-Total of 15 years and more in other state                               | 0.23        | 0.39        | 0.21        | 0.38        | <b>0.62</b> | 0.06 | 0.05        | -0.02 |
| P72 | population-Total males of 15 years and more in other condition                     | 0.24        | 0.26        | 0.22        | 0.39        | <b>0.64</b> | 0.11 | 0.04        | -0.11 |
| P73 | population moving Daily in the municipality of habitual dwelling                   | <b>0.73</b> | 0.33        | 0.47        | 0.20        | 0.09        | 0.15 | 0.20        | 0.12  |
| P74 | population moving daily out of the municipality of habitual dwelling               | <b>0.75</b> | 0.33        | 0.35        | 0.09        | 0.02        | 0.16 | 0.13        | -0.09 |
| P75 | population-Total of 15 years and more earners of income from work or capital       | 0.29        | <b>0.86</b> | 0.20        | 0.15        | 0.11        | 0.29 | 0.06        | -0.02 |
| P76 | population-Total males of 15 years and more earners of income from work or capital | 0.30        | <b>0.81</b> | 0.22        | 0.11        | 0.09        | 0.39 | 0.07        | -0.08 |



## 2.3 Results of cluster analysis

**Table S4.** Groundwater monitoring stations of aquifer A and B and their categorization based on cluster analysis.

| well number | station in aquifer B | CBZ cluster in aquifer B | station in aquifer A | CBZ cluster in aquifer A |
|-------------|----------------------|--------------------------|----------------------|--------------------------|
| 1           | B1                   | CLB1                     | A1                   | CLA2                     |
| 2           | B2                   | CLB4                     | A2                   | CLA1                     |
| 3           | B3                   | CLB3                     | A3                   | CLA1                     |
| 4           | B4                   | CLB3                     | A4                   | CLA4                     |
| 5           | B5                   | CLB2                     | A5                   | CLA1                     |
| 6           | B6                   | CLB3                     | A6                   | CLA1                     |
| 7           | B7                   | CLB5                     | A7                   | CLA3                     |
| 8           | B8                   | CLB2                     | A8                   | CLA2                     |
| 9           | B9                   | CLB4                     | A9                   | CLA4                     |
| 10          | B10                  | CLB4                     | A10                  | CLA4                     |
| 11          | B11                  | CLB4                     | A11                  | CLA1                     |
| 12          | B12                  | CLB5                     | A12                  | CLA3                     |
| 13          | B13                  | CLB5                     | A13                  | CLA1                     |
| 14          | B14                  | CLB1                     | A14                  | CLA2                     |
| 15          | B15                  | CLB1                     | A15                  | CLA4                     |
| 16          | B16                  | CLB3                     | A16                  | CLA4                     |
| 17          | B17                  | CLB2                     | A17                  | CLA3                     |
| 18          | B18                  | CLB4                     | A18                  | CLA2                     |
| 19          | B19                  | CLB2                     | A19                  | CLA2                     |
| 20          | B20                  | CLB2                     | A20                  | CLA2                     |
| 21          | B21                  | CLB4                     | A21                  | CLA3                     |

**Table S5.** Descriptive statistics. This table reports summary statistics of the variables in each cluster of aquifer B.

| CBZ clusters in aquifer B |                 | Statistic | Std. Error |
|---------------------------|-----------------|-----------|------------|
| CLB 1                     | Mean            | 1.9033    | 1.07       |
|                           | Median          | 1.6100    |            |
|                           | Variance        | 3.487     |            |
|                           | Std. Deviation  | 1.86736   |            |
|                           | Minimum         | 0.20      |            |
|                           | Maximum         | 3.90      |            |
|                           | Range           | 3.70      |            |
|                           | Skewness        | 0.689     | 1.225      |
| CLB 2                     | Mean            | 8.9       | 0.65       |
|                           | 5% Trimmed Mean | 9.01      |            |
|                           | Median          | 9.41      |            |
|                           | Variance        | 2.15      |            |
|                           | Std. Deviation  | 1.46      |            |
|                           | Minimum         | 7.33      |            |

|                  |                     |        |       |
|------------------|---------------------|--------|-------|
|                  | Maximum             | 10.40  |       |
|                  | Range               | 3.06   |       |
|                  | Interquartile Range | 2.89   |       |
|                  | Skewness            | -0.34  | 0.91  |
|                  | Kurtosis            | -3.01  | 2     |
| <b>CLB<br/>3</b> | Mean                | 16.24  | 0.10  |
|                  | 5% Trimmed Mean     | 16.24  |       |
|                  | Median              | 16.26  |       |
|                  | Variance            | 0.043  |       |
|                  | Std. Deviation      | 0.20   |       |
|                  | Minimum             | 15.99  |       |
|                  | Maximum             | 16.47  |       |
|                  | Range               | 0.48   |       |
|                  | Interquartile Range | 0.40   |       |
|                  | Skewness            | -0.41  | 1.01  |
|                  | Kurtosis            | -0.74  | 2.61  |
| <b>CLB<br/>4</b> | Mean                | 14.04  | 0.47  |
|                  | 5% Trimmed Mean     | 14.09  |       |
|                  | Median              | 14.51  |       |
|                  | Variance            | 1.37   |       |
|                  | Std. Deviation      | 1.17   |       |
|                  | Minimum             | 12.13  |       |
|                  | Maximum             | 15.08  |       |
|                  | Range               | 2.95   |       |
|                  | Interquartile Range | 2.12   |       |
|                  | Skewness            | -1.088 | 0.845 |
|                  | Kurtosis            | -0.272 | 1.74  |
| <b>CLB<br/>5</b> | Mean                | 26.59  | 2.59  |
|                  | Median              | 25.34  |       |
|                  | Variance            | 20.13  |       |
|                  | Std. Deviation      | 4.48   |       |
|                  | Minimum             | 22.86  |       |
|                  | Maximum             | 31.57  |       |
|                  | Range               | 8.71   |       |
|                  | Skewness            | 1.156  | 1.22  |

**Table S6.** Descriptive statistics. This table reports summary statistics of the variables in each cluster of aquifer A

| CBZ clusters in aquifer A |                 | Statistic | Std. Error |
|---------------------------|-----------------|-----------|------------|
| <b>CLA1</b>               | Mean            | 18.91     | 2.09       |
|                           | 5% Trimmed Mean | 18.86     |            |

|      |                     |        |       |
|------|---------------------|--------|-------|
|      | Median              | 18.68  |       |
|      | Variance            | 26.33  |       |
|      | Std. Deviation      | 5.13   |       |
|      | Minimum             | 13.60  |       |
|      | Maximum             | 25.10  |       |
|      | Range               | 11.50  |       |
|      | Interquartile Range | 10.53  |       |
|      | Skewness            | 0.10   | 0.84  |
|      | Kurtosis            | -2.49  | 1.74  |
| CLA2 | Mean                | 6.37   | 1.41  |
|      | 5% Trimmed Mean     | 6.47   |       |
|      | Median              | 7.50   |       |
|      | Variance            | 12.05  |       |
|      | Std. Deviation      | 3.47   |       |
|      | Minimum             | 1.53   |       |
|      | Maximum             | 9.40   |       |
|      | Range               | 7.87   |       |
|      | Interquartile Range | 6.70   |       |
|      | Skewness            | -0.565 | 0.84  |
|      | Kurtosis            | -1.94  | 1.74  |
| CLA3 | Mean                | 82.61  | 9.00  |
|      | 5% Trimmed Mean     | 82.73  |       |
|      | Median              | 83.64  |       |
|      | Variance            | 324.3  |       |
|      | Std. Deviation      | 18.008 |       |
|      | Minimum             | 65.03  |       |
|      | Maximum             | 98.16  |       |
|      | Range               | 33.13  |       |
|      | Interquartile Range | 32.09  |       |
|      | Skewness            | -.045  | 1.01  |
|      | Kurtosis            | -5.74  | 2.61  |
| CLA4 | Mean                | 41.13  | 2.11  |
|      | 5% Trimmed Mean     | 41.19  |       |
|      | Median              | 41.80  |       |
|      | Variance            | 22.26  |       |
|      | Std. Deviation      | 4.719  |       |
|      | Minimum             | 34.57  |       |
|      | Maximum             | 46.60  |       |
|      | Range               | 12.03  |       |
|      | Interquartile Range | 8.81   |       |
|      | Skewness            | -.435  | 0.913 |
|      | Kurtosis            | -0.748 | 2     |
